# Supplementary material for: Facile synthesis of porous CoFe2O4 nanosheets for lithium-ion battery anodes with enhanced rate capability and cycling stability
Source: Royal Society of Chemistry journal article supplement (doi:10.1039/c4ra02835j), 2014-01-01
Supplement: c4ra02835j1.pdf [file c4ra02835j1.pdf]

## **Supplementary information**

### **Facile synthesis of porous CoFe<sub>2</sub>O<sub>4</sub> nanosheets for lithium-ion battery anodes with enhanced rate capability and cycling stability**

**Xiayin Yao, Junhua Kong, Xiaosheng Tang, Dan Zhou, Chenyang Zhao,  
Rui Zhou and Xuehong Lu\***

School of Materials Science and Engineering, Nanyang Technological University, 50  
Nanyang Avenue, 639798, Singapore

\*Corresponding Author: ASXHLu@ntu.edu.sg (Prof. X. Lu)

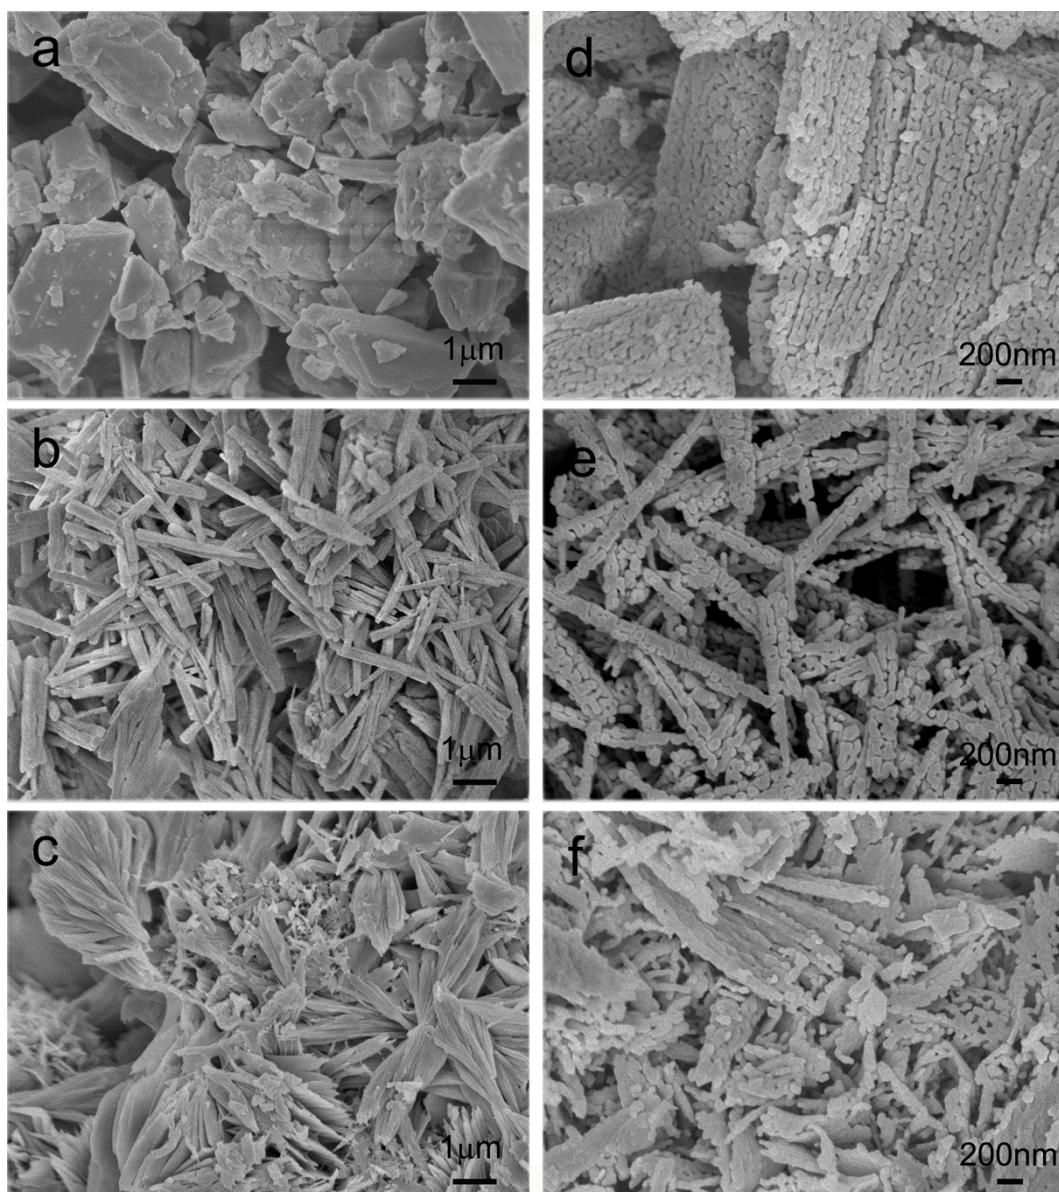

Figure S1 SEM images of  $(\text{CoFe}_2)_{1/3}\text{C}_2\text{O}_4 \cdot 2\text{H}_2\text{O}$  synthesized with various PVA aqueous solution concentrations: (a) 0 wt%, (b) 0.15 wt% and (c) 1.5 wt%; (d-f) are the corresponding  $\text{CoFe}_2\text{O}_4$  calcinated at  $600^\circ\text{C}$ .

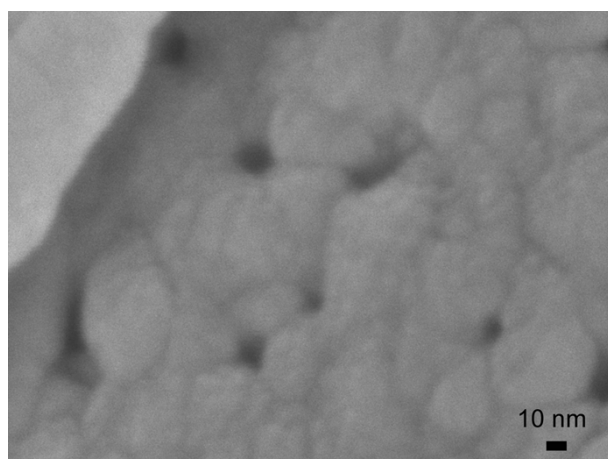

Figure S2 A high-magnification SEM image of the porous  $\text{CoFe}_2\text{O}_4$  nanosheets.
